# Supplementary material for: Development of a Whole Organism Platform for Phenotype-Based Analysis of IGF1R-PI3K-Akt-Tor Action
Source: PubMed Central journal article supplement (PMC5435685; doi:10.1038/s41598-017-01687-3), 2017-05-17

23 **Supplemental figure legends**

24

25 Supplemental Figure 1. Low  $[Ca^{2+}]$  stress increases the *trpv5/6* expression but not NaR cell  
26 number or *igfbp5a* mRNA expression in early embryos. **a-b)** Zebrafish embryos were raised in  
27 normal or low  $[Ca^{2+}]$  embryo rearing solution from 0 to 48 and 72 hpf. The levels of *trpv5/6* (**a**)  
28 and *igfbp5a* (**b**) mRNA were measured and normalized by  $\beta$ -*actin* mRNA levels. Data shown are  
29 mean  $\pm$  SEM, n = 3. Different letters indicate differences at  $p < 0.05$ . **c)** 72 hpf embryos raised in  
30 the indicated  $[Ca^{2+}]$  water were analyzed by *in situ* hybridization using *igfbp5a* probe. NaR cells  
31 on both side of yolk sac were manually counted. Data shown are mean  $\pm$  SEM, n = 8-9. ns, not  
32 statistically significant.

33

34 Supplemental Figure 2. Different effects of low  $[Ca^{2+}]$  stress on *igfbp5a* and *trpv5/6* mRNA  
35 levels. **a)** Schematic diagram illustrating the experimental design. **b-c)** Changes in *trpv5/6* (**b**) and  
36 *igfbp5a* (**c**) mRNA levels. Data show are Mean  $\pm$  SEM, n=3. Different letters indicate statistically  
37 significant differences at  $p < 0.05$ .

38

39 Supplemental Figure 3. Generation of *Tg(igfbp5a:GFP)* transgenic fish using Tol2-mediated  
40 BAC transgenesis. **a)** Schematic diagram of the *BAC(igfbp5a:GFP)* construct engineered. Filled  
41 boxes indicate *igfbp5a* ORF and open boxes indicate UTR. The iTol2 cassette and GFP reporter  
42 gene cassette were introduced into DKEYP-56B7 by homologous recombination. The *igfbp5a*  
43 sequence from the start codon to the end of first exon was replaced by the GFP cassette. **b)** The  
44 indicated DNA was subjected to Sal I digestion. Arrows showed the different bands after  
45 recombineering. **c)** PCR validation of the GFP cassette insertion. Forward and reverse primers  
46 were designed to target the 5'UTR of *igfbp5a* and the *GFP* gene protein coding sequence (upper  
47 panel). PCR result is shown in the lower panel. **d)** Representative view of GFP expression in  
48 *BAC(igfbp5a:GFP)*-injected F0 larvae at 120 hpf.

49

50 Supplemental Figure 4. The GFP-positive cells are NaR cells. **a)** GFP-positive cells express  
51 *trpv5/6* mRNA. *Tg(igfbp5a:GFP)* raised in normal  $[Ca^{2+}]$  medium were sampled at 120 hpf and  
52 analyzed by *in situ* hybridization for *trpv5/6* mRNA expression (green, left panels) and GFP  
53 immunostaining (red, middle panel). Merged view is shown in the right panel. Scale bar = 50  $\mu$ m.  
54 **b-c)** The *igfbp5a* mRNA (**b**) and *trpv5/6* mRNA (**c**) is highly expressed in GFP-positive cells .  
55 *Tg(igfbp5a:GFP)* larvae (72 hpf) were transferred to 0.2 or 0.001 mM  $[Ca^{2+}]$  medium. 18h later,  
56 GFP-positive cells were isolated by FACS as described in Materials and Methods. The levels of  
57 *igfbp5a* and *trpv5/6* mRNA were determined by qPCR and normalized by the *18s* mRNA levels.  
58 Values are mean  $\pm$  SEM of two independent experiments. GFP+ and GFP- indicates GFP  
59 positive- and GFP-negative cells.

60

61 Supplemental Figure 5. The GFP fluorescence intensity is highly correlated with NaR cell  
62 number. The NaR cell number and GFP fluorescence intensity data shown in Fig. 4 were  
63 subjected to correlation analysis.

64

65 Supplemental Figure 6. The expressions of 4 *igf1r* and *insr* mRNA in NaR cells.  
66 *Tg(igfbp5a:GFP)* larvae (72 hpf) were transferred to 0.2 or 0.001 mM  $[Ca^{2+}]$  water for 18h. NaR  
67 cells were isolated using FACS. The expressions of *igf1ra* (**a**), *igf1rb* (**b**), *insra* (**c**) and *insrb* (**d**)  
68 mRNA were measured by qPCR and normalized by *18s* mRNA levels. Values are mean  $\pm$  SEM.  
69 Values are mean  $\pm$  SEM of two independent experiments.

70

71 Supplemental Figure 7. **a)** Four different levels of pS6 signal were observed in zebrafish larvae  
72 and used for quantification. **b)** Torin1 treatment abolishes low  $[Ca^{2+}]$ -induced pAkt signaling. 72  
73 hpf wild type larvae were transferred to 0.2 or 0.001 mM  $[Ca^{2+}]$  solution containing DMSO or  
74 Torin1 (1 $\mu$ M). After 8h, they were subjected to immunostaining using an anti-phospho-Akt

75 (S473) antibody. Data shown are mean  $\pm$  SEM. n = 14-16. Different letters indicate significant  
76 differences at  $p < 0.05$ . **c)** AZD8055 treatment abolishes low  $[Ca^{2+}]$ -induced pAkt signaling.  
77 AZD8055 (1  $\mu$ M) and rapamycin (10  $\mu$ M) were used. Representative images are shown.

78

79 Supplemental video 1. A 72 hpf *Tg(igfbp5a:GFP)* larva was transferred to low  $[Ca^{2+}]$  water and  
80 time lapse movie was taken over the next 48 h. The frame focuses on the yolk sac region where  
81 the NaR cells are located.

# Supplemental Figure 1

**a**

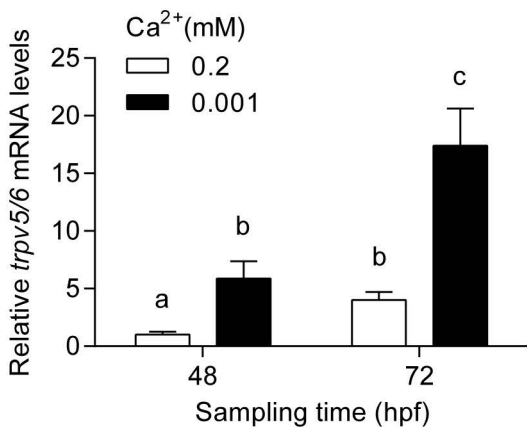

**b**

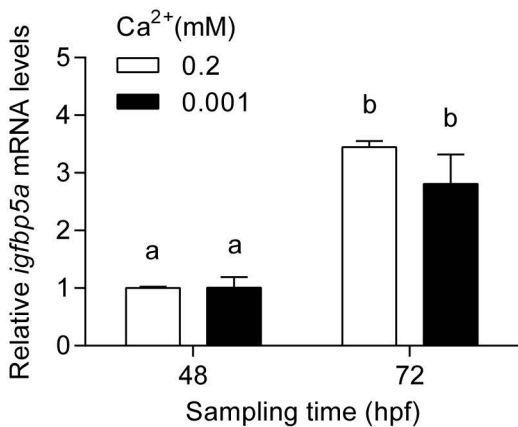

**c**

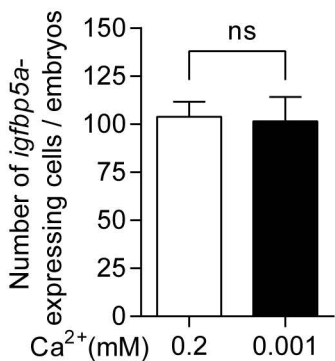



# Supplemental Figure 3

**a**

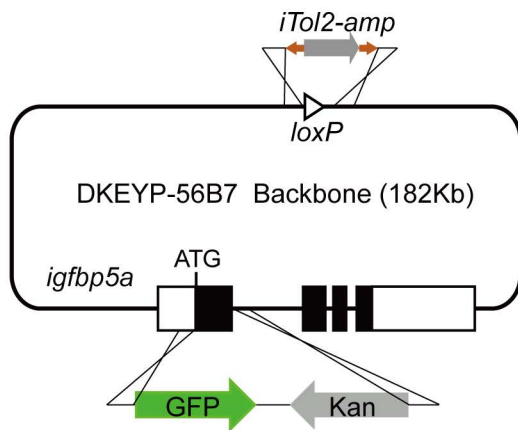

**b**

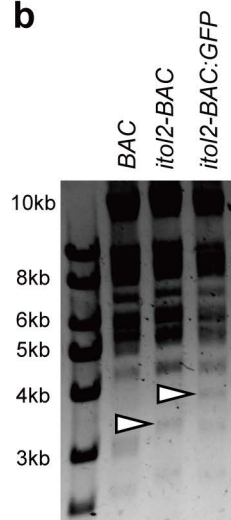

**c**

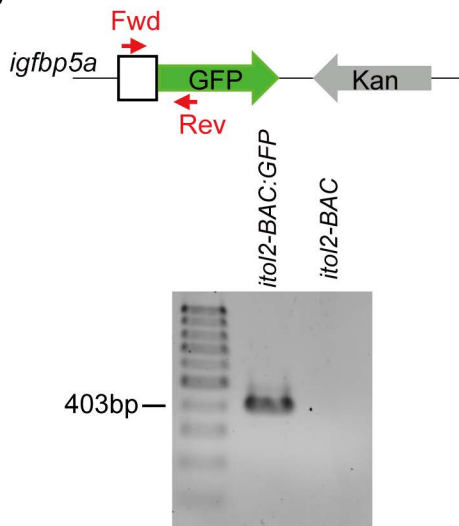

**d**

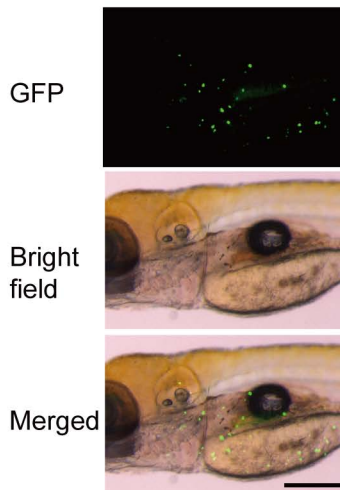

# Supplemental Figure 4

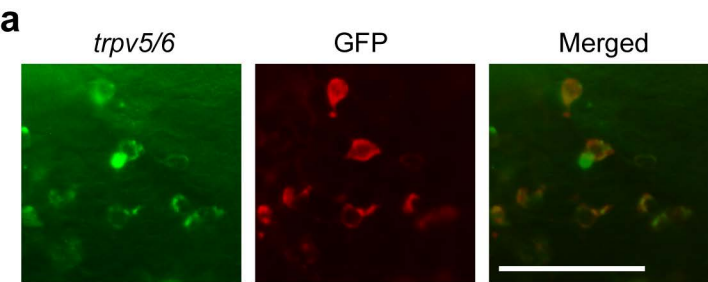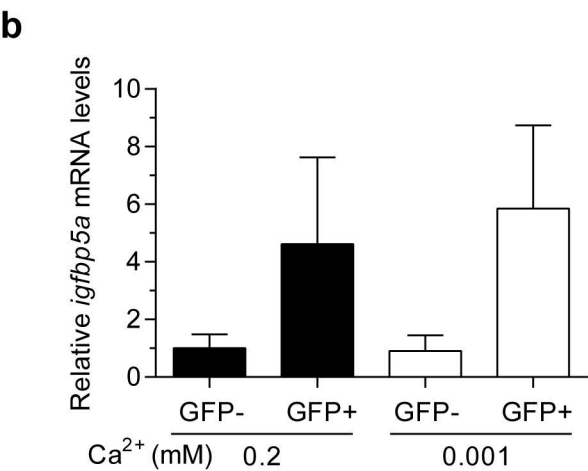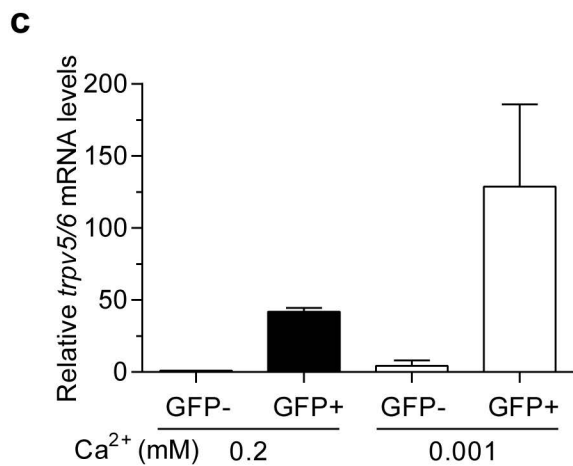



# Supplemental Figure 5

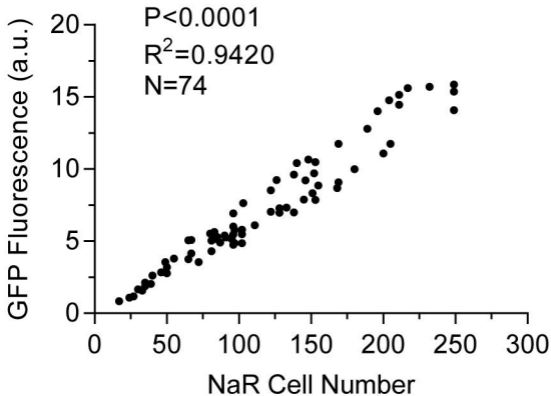

# Supplemental Figure 6

**a**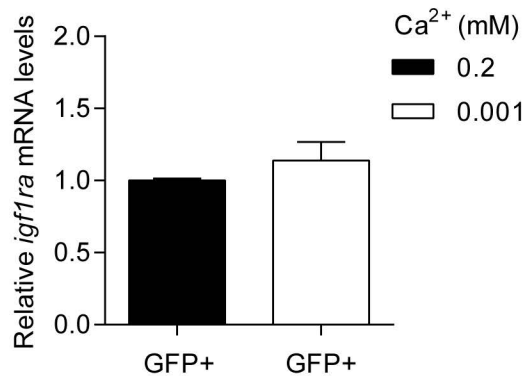**b**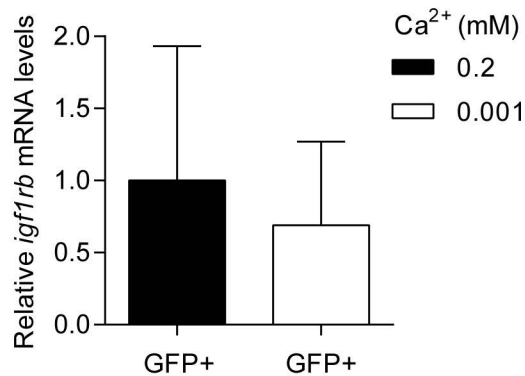**c**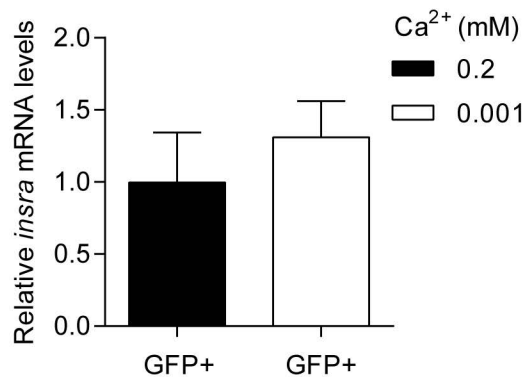**d**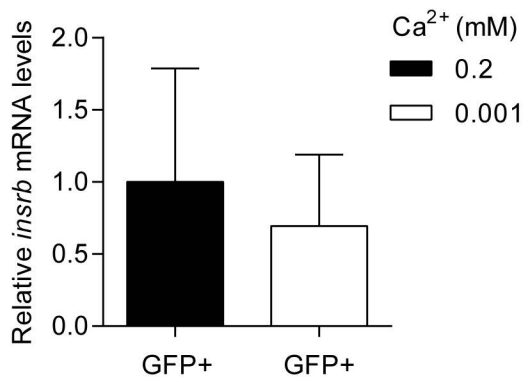

# Supplemental Figure 7

**a**

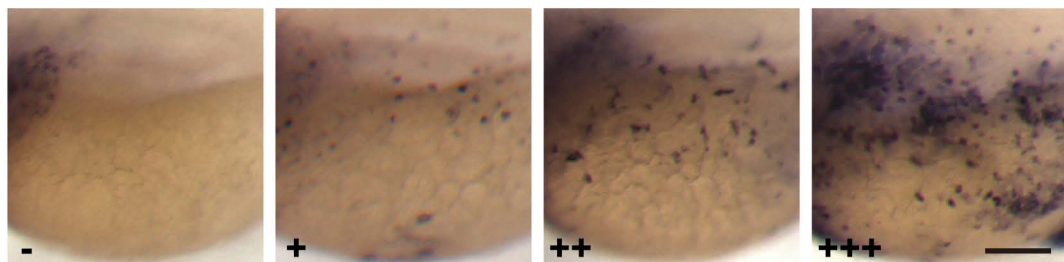

**b**

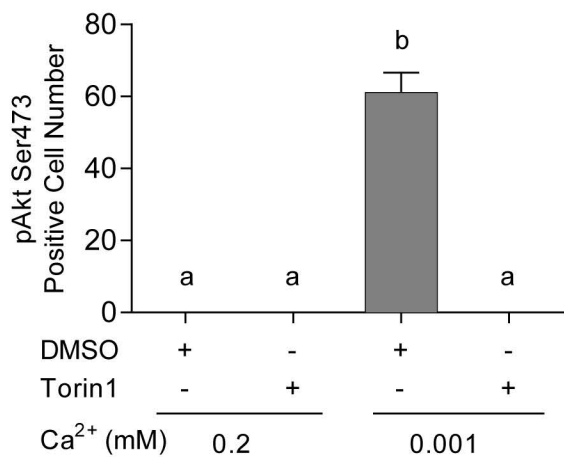

**c**

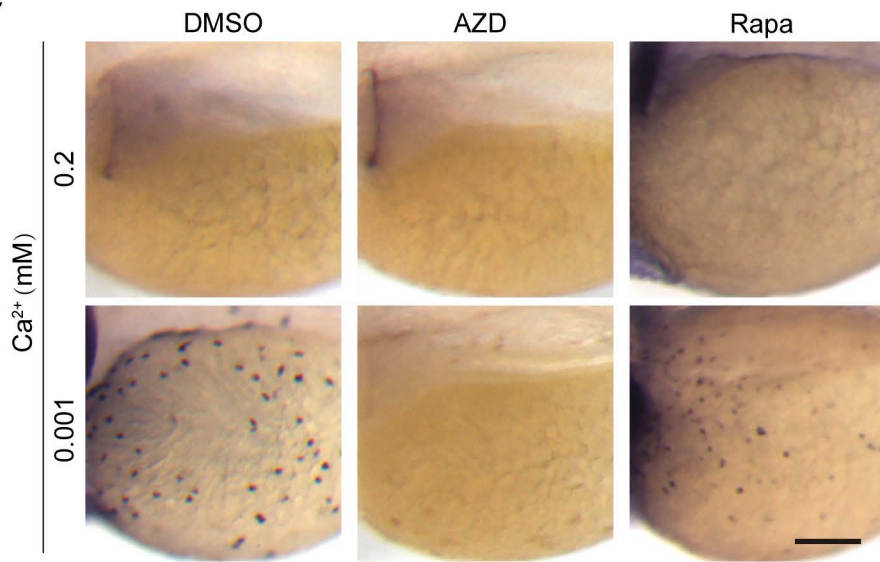

Supplement: 41598_2017_1687_MOESM1_ESM.pdf [file 41598_2017_1687_MOESM1_ESM.pdf]
